# Supplementary material for: Enhanced photo-assisted ethanol electro-oxidation activity by using broadband visible light absorption of a graphitic C3N4/BiOI carrier
Source: Royal Society of Chemistry journal article supplement (doi:10.1039/c8se00507a), 2018-11-21
Supplement: c8se00507a1.pdf [file c8se00507a1.pdf]

## Electronic supplementary information

### Enhanced Photo-Assisted Ethanol Electro-Oxidation Activity by Using Broadband Visible Light Absorption of Graphitic C<sub>3</sub>N<sub>4</sub>/BiOI Carrier

Jiayue Hu <sup>a,b</sup>, Chunyang Zhai <sup>b</sup>, Haifeng Gao <sup>a</sup>, Lixi Zeng <sup>a,\*</sup>, Yukou Du <sup>c</sup>, Mingshan

Zhu <sup>a\*</sup>

<sup>a</sup> Guangdong Key Laboratory of Environmental Pollution and Health,

School of Environment, Jinan University, Guangzhou 510632, P. R. China.

<sup>b</sup> School of Materials Science and Chemical Engineering, Ningbo University, Ningbo

315211, P.R. China

<sup>c</sup> College of Chemistry, Chemical Engineering and Materials Science, Soochow

University, Suzhou 215123, P. R. China

\*E-mail: [lxzeng@jnu.edu.cn](mailto:lxzeng@jnu.edu.cn) (L.Z.); and [mingshanzhu@yahoo.com](mailto:mingshanzhu@yahoo.com) (M.Z.).

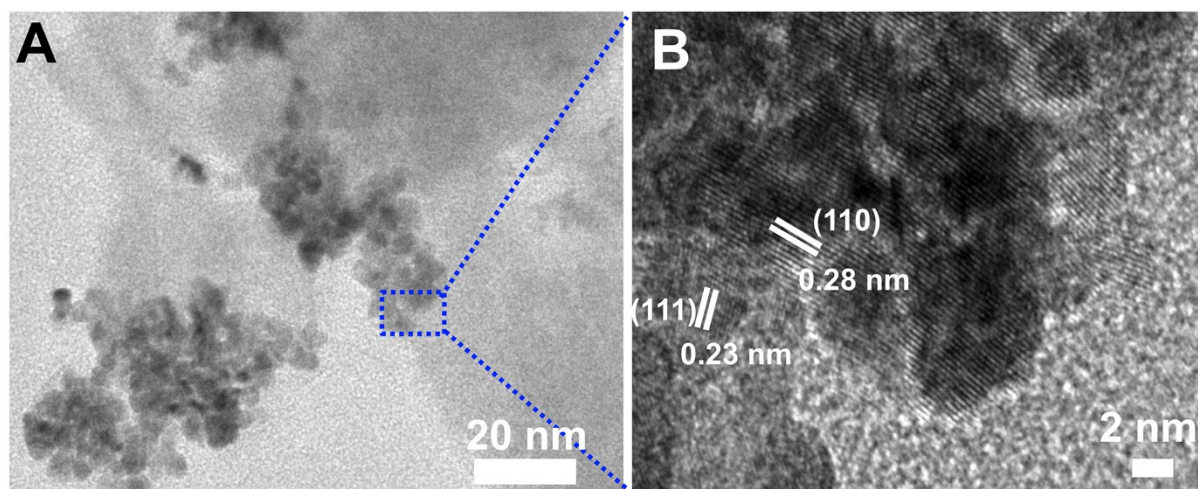

**Figure S1.** TEM (A) and HRTEM (B) images of Pt/g-C<sub>3</sub>N<sub>4</sub>/BiOI.

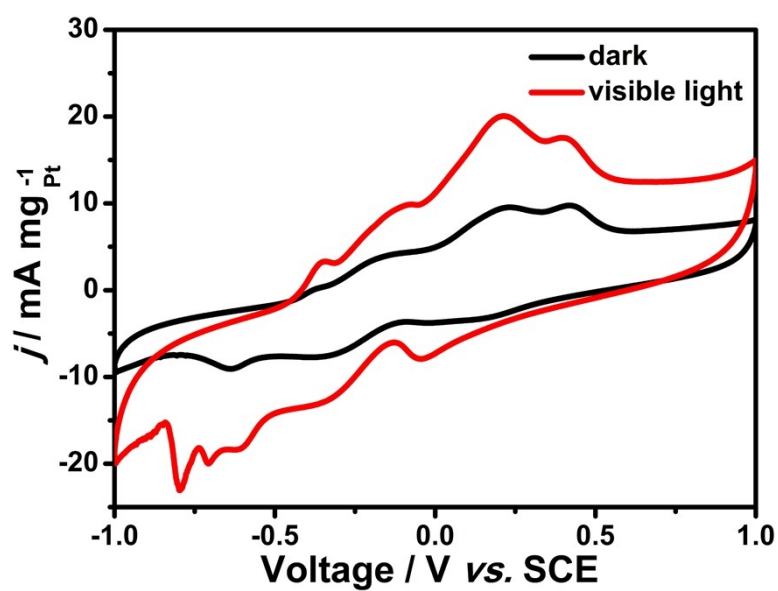

**Figure S2.** CVs of Pt/g-C<sub>3</sub>N<sub>4</sub>/BiOI in 1.0 M CH<sub>3</sub>CH<sub>2</sub>OH + 0.5 M Na<sub>2</sub>SO<sub>4</sub> solution at a scan rate of 50 mV s<sup>-1</sup> under visible light illumination and dark environment.
